# Supplementary figures and images for: Integrated epigenomic analyses of neuronal MeCP2 reveal a role for long-range interaction with active genes
Source: HighWire-hosted journal article supplement (doi:10.1073/pnas.0707442104), 2007-11-28

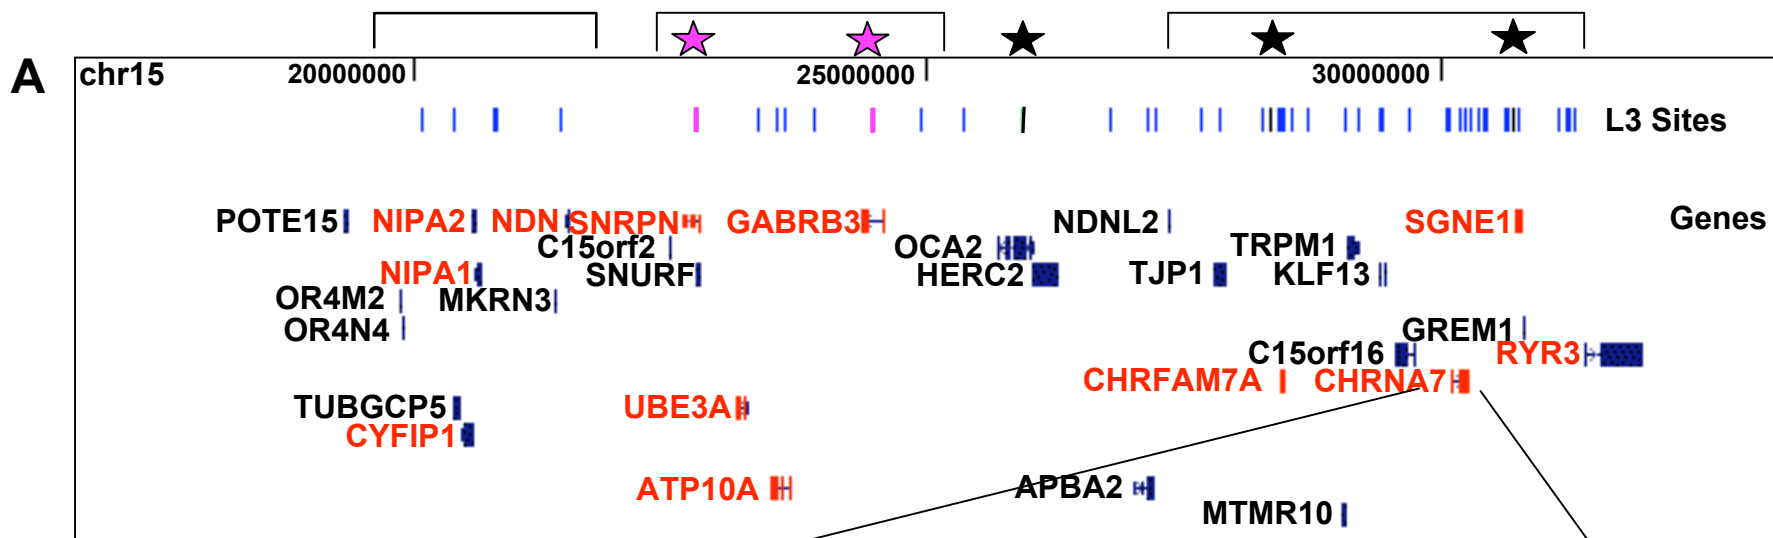

★ Previously described and validated  
 ★ Validated

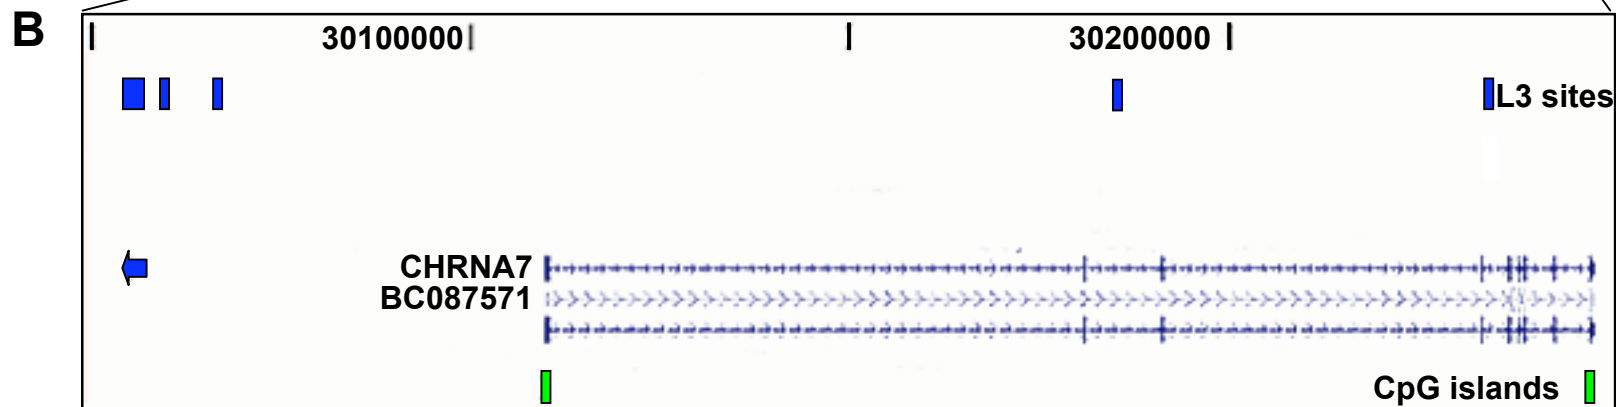

Validated in human

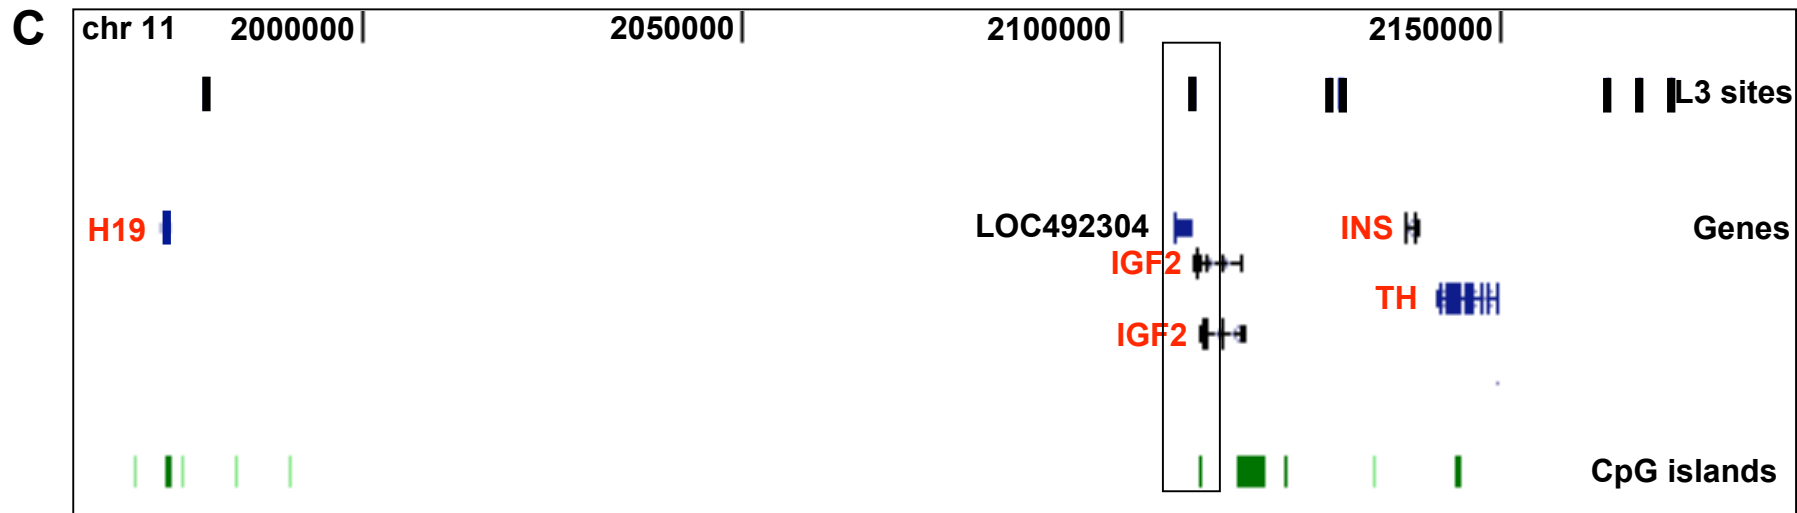

Supplement: 07442Fig8.pdf [file 07442Fig8.pdf]
